# Supplementary material for: Synergistic effect of oxygen vacancies and Ni particles over the ZnWO4/CdS heterostructure for enhanced photocatalytic reduction and oxidation activities
Source: Royal Society of Chemistry journal article supplement (doi:10.1039/d2cy01872a), 2022-12-28
Supplement: d2cy01872a1.pdf [file d2cy01872a1.pdf]

**Electronic Supplementary Information**

**Synergistic effect of oxygen vacancy and Ni particles  
over ZnWO<sub>4</sub>/CdS heterostructure for enhancing  
photocatalytic reduction and oxidation activities**

Houfeng Zhang <sup>a</sup>, Shenglong Gan <sup>a</sup>, Dongfang Hou <sup>a,b,\*</sup>, Xiu-qing Qiao <sup>a</sup>, Ru-An  
Chi <sup>a,b</sup>, Dong-Sheng Li <sup>a,b,\*</sup>

<sup>a</sup> *College of Materials and Chemical Engineering, Key Laboratory of Inorganic Nonmetallic  
Crystalline and Energy Conversion Materials, China Three Gorges University, Yichang, Hubei  
443002, P.R. China*

<sup>b</sup> *Hubei Three Gorges Laboratory, Yichang, Hubei 443007, P. R. China*

**\*Corresponding authors**

[dfhouok@126.com](mailto:dfhouok@126.com) (D. Hou), [lidongsheng1@126.com](mailto:lidongsheng1@126.com) (D. S. Li)

## Materials and Characterizations

All chemicals commercially obtained were used directly. Nickel chloride hexahydrate ( $\text{NiCl}_2 \cdot 6\text{H}_2\text{O}$ ) was obtained from Xiya Chemical Technology (Shandong) Co., Ltd. Sodium tungstate dihydrate ( $\text{Na}_2\text{WO}_4 \cdot 2\text{H}_2\text{O}$ ), Zinc chloride ( $\text{ZnCl}_2$ , AR), Thiourea ( $\text{CS}(\text{NH}_2)_2$ , AR) and Cadmium acetate dihydrate ( $\text{Cd}(\text{Ac})_2 \cdot 2\text{H}_2\text{O}$ ) were provided from Sinopharm Chemical Reagent Co., Ltd.

X-ray diffraction (XRD) of the as-obtained products were carried out on the RigakuUltima IV X-ray diffractometer using Cu-K $\alpha$  ( $\lambda=1.5418$  nm) radiation. The accelerating voltage and the applied current were at 40 kV and 40 mA, respectively. Scanning electron microscope (SEM, JEOL JSM 7500F), transmission electron microscope (TEM, Tecnai G2 F20 S TWIN) equipped with an energy dispersive spectrometer (EDS) and high-resolution transmission electron microscopy (HRTEM) images were used to observe or determine the morphology and microstructure. X-ray photoelectron spectroscopy (XPS) measurement was taken with the Escalab 250 Xi multifunctional photoelectron spectrometer produced by Thermo Fisher Scientific. The Brunauer–Emmett–Teller (BET) specific surface was determined by nitrogen adsorption in a Belsorp max physical adsorption instrument (Bayer, Japan). The desorption isotherm was used to analysis the pore size distribution by Barrett-Joyner-Halenda (BJH) method. The UV-2550 ultraviolet-visible spectrophotometer produced by Shimadzu Corporation was used to obtain the light absorption performance (Diffuse reflection spectrum, DRS) of the sample at a wavelength range of 200–800 nm. Photo-luminescence (PL) analysis and Time-resolved photoluminescence (TRPL) was recorded with a LS55 fluorescence spectrometer (Perkin-Elmer, USA). The analysis of free radicals was recorded with the electron spin resonance (ESR, JES FA200 spectrometer, Japan) by mixing the photocatalysts in a 5,5-Dimethyl-1-pyrroline N-oxide (DMPO) solution tank (methanol dispersion for  $\text{DMPO} \cdot \text{OOH}/\text{O}_2 \cdot$  and aqueous dispersion for  $\text{DMPO} \cdot \text{OH}$ ). And the generation of vacancies was determined by electron paramagnetic resonance (EPR, Bruker, USA). Electrochemical and photoelectrochemical tests were implemented on the CHI 660E electrochemical system in a standard three-electrode quartz cell with the as-prepared samples as the working electrode, a platinum wire (Pt) as the counter electrode, and Ag/AgCl (saturated KCl) as a reference electrode, respectively.

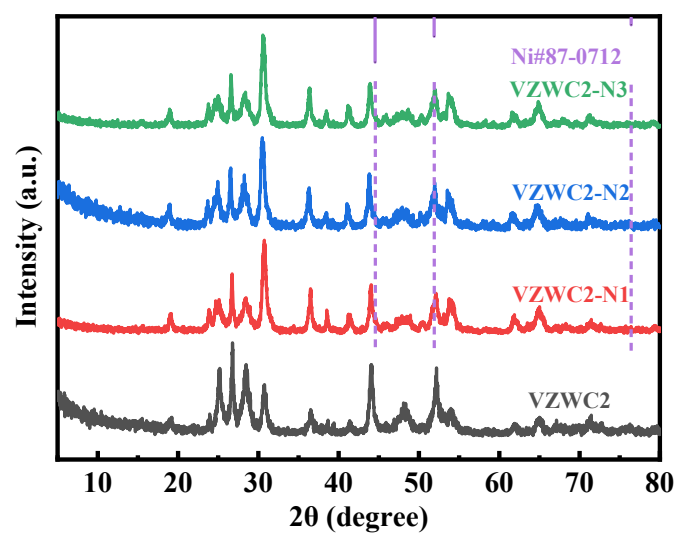

**Fig. S1** XRD patterns of VZWC2, VZWC2-N1, VZWC2-N2, and VZWC2-N3

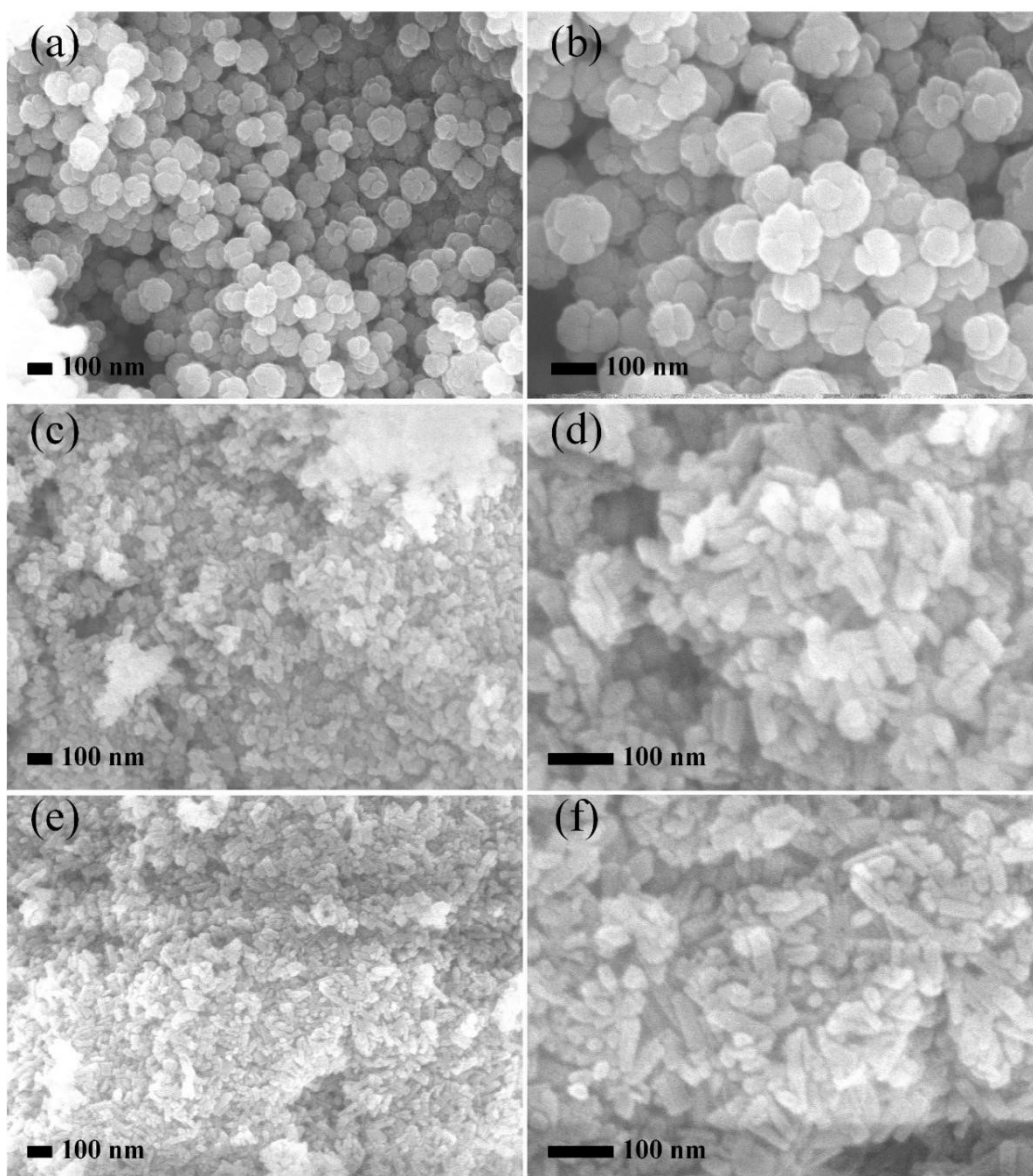

**Fig. S2** FESEM images of (a-b) CdS, (c-d) Vo-ZnWO<sub>4</sub>,(e-f) ZnWO<sub>4</sub>

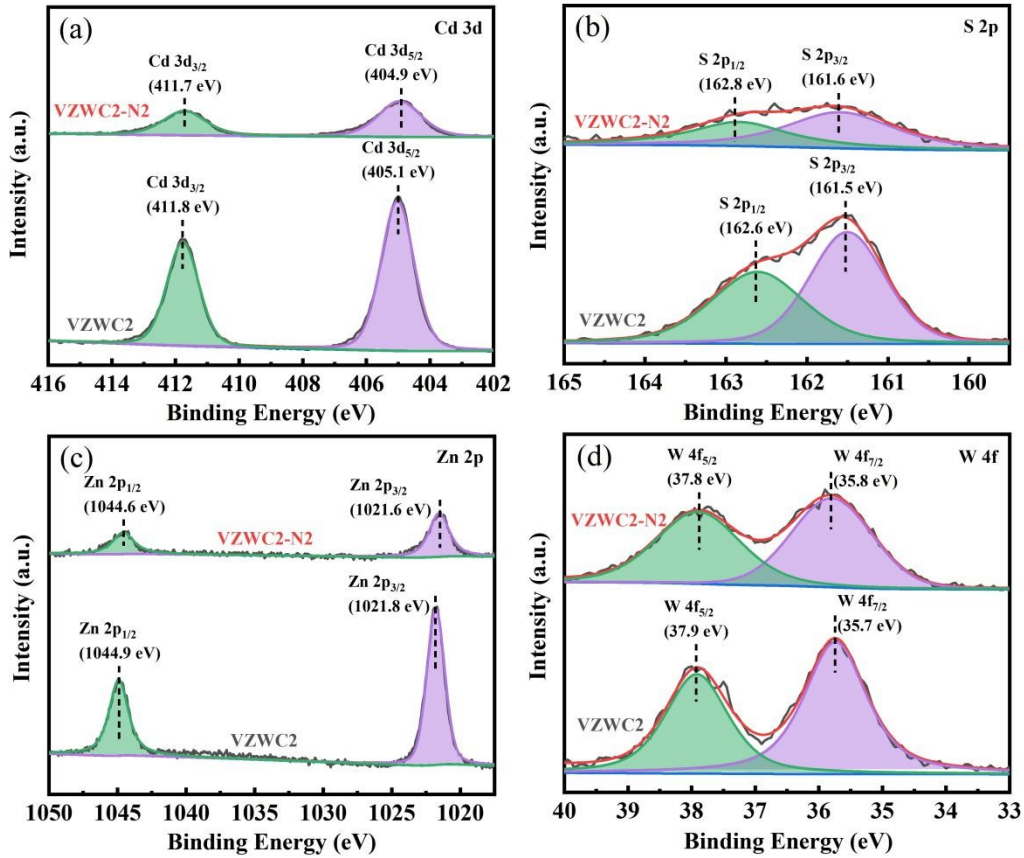

**Fig. S3** High-resolution XPS spectra of (a) Cd 3d, (b) S 2p, (c) Zn 2p, (d) W 4f for VZWC2-N2.

Fig. S3a-d shows the XPS spectra of Cd 3d and S 2p, Zn 2p, W4f. In VZWC2, the high-resolution Cd spectrum indicated the existence of Cd 3d 5/2 and 3d 3/2 peaks centered at 411.7 eV and 404.9 eV, respectively. The binding energies of the S 2p 1/2 and 2p 3/2 peaks are located at 162.6 eV and 161.5 eV. The peaks located at 1021.6 eV and 1044.6 eV in the XPS spectrum of Zn 2p could be ascribed to the characteristic peaks of Zn 2p<sub>3/2</sub> and Zn 2p<sub>1/2</sub> spin-orbit components of Zn<sup>2+</sup>. The W4f XPS spectra of the V<sub>o</sub>-ZnWO<sub>4</sub> surface are simple spin dipoles with BE of 37.8 and 35.8 eV corresponding to W 4f<sub>5/2</sub> and W 4f<sub>7/2</sub>, respectively, indicating the presence of the W<sup>6+</sup> state in V<sub>o</sub>-ZnWO<sub>4</sub>.

**Table S1** Summary of material properties

| Sample               | Specific surface area | Mean pore diameter |
|----------------------|-----------------------|--------------------|
| Vo-ZnWO <sub>4</sub> | 28.820                | 27.075             |
| CdS                  | 12.696                | 13.769             |
| VZWC2                | 22.964                | 29.039             |
| VZWC2-N2             | 17.713                | 35.959             |

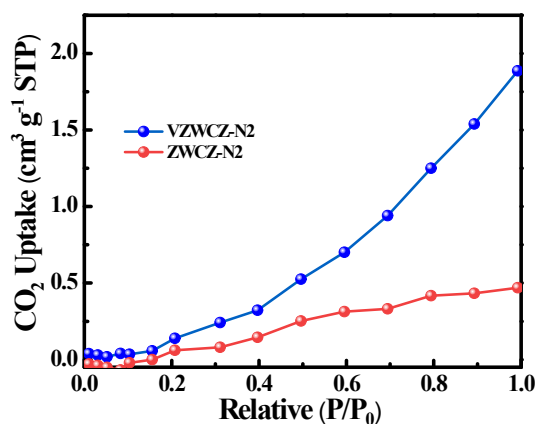

**Fig. S4** CO<sub>2</sub> adsorption curves measured at 298 K of VZWC2-N2 and ZWC2-N2.

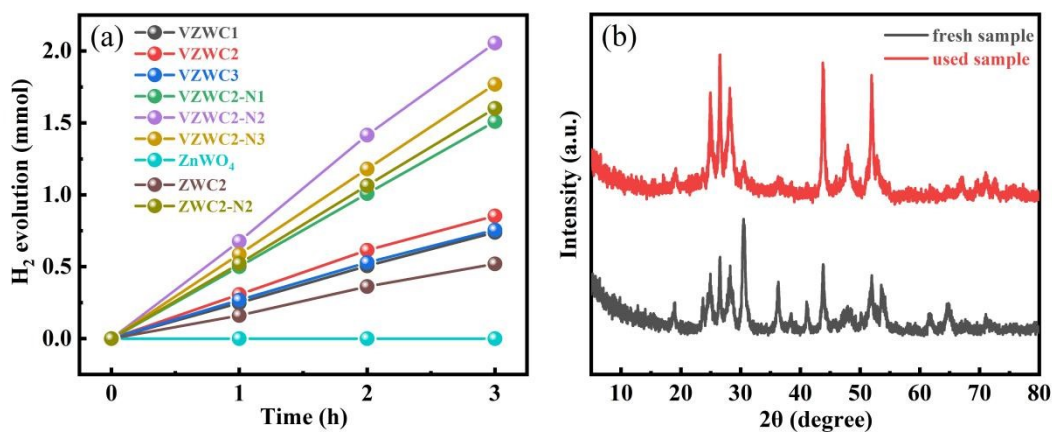

**Fig. S5** (a) The comparison of photocatalytic H<sub>2</sub> production activities of different photocatalysts under visible light irradiation. (b) XRD patterns of ZWC2-N2 before and after test.

**Table S2** The radiative fluorescence lifetimes and relative percentages of the photoinduced charge carriers in the samples

| Sample               | $\tau_1$ (ns) | Rel. (%) | $\tau_2$ (ns) | Rel. (%) | $\tau$ (ns) |
|----------------------|---------------|----------|---------------|----------|-------------|
| Vo-ZnWO <sub>4</sub> | 0.1253        | 86.24    | 1.0024        | 13.76    | 0.617105    |
| CdS                  | 0.5421        | 68.21    | 2.5678        | 31.79    | 1.936273    |
| VZWC2                | 1.9256        | 48.35    | 5.2637        | 8.3649   | 4.412167    |
| VZWC2-N2             | 2.1188        | 58.01    | 8.3649        | 41.99    | 6.745767    |

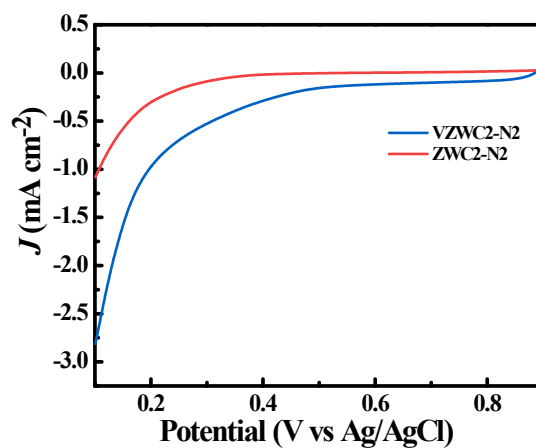

**Fig. S6** Linear sweep voltammograms of VZWC2-N2 and ZWC2-N2 in 0.5 M H<sub>2</sub>SO<sub>4</sub> aqueous solution.
